# Supplementary material for: Source analyses of ambient VOCs considering reactive losses: methods of reducing loss effects, impacts of losses, and sources
Source: Copernicus journal article supplement (doi:10.5194/egusphere-2024-916), 2024-04-08
Supplement: Supplementary file 1 [file egusphere-2024-916-supplement.pdf]

## Supplementary materials for

### Source analyses of ambient VOCs considering reactive losses: methods of reducing loss effects, impacts of losses, and sources

Baoshuang Liu<sup>1,2\*</sup>, Yao Gu<sup>1,2</sup>, Yutong Wu<sup>1,2</sup>, Qili Dai<sup>1,2</sup>, Shaojie Song<sup>1,2</sup>, Yinchang Feng<sup>1,2\*</sup>, and Philip K. Hopke<sup>3,4</sup>

<sup>1</sup>State Environmental Protection Key Laboratory of Urban Ambient Air Particulate Matter Pollution Prevention and Control & Tianjin Key Laboratory of Urban Transport Emission Research, College of Environmental Science and Engineering, Nankai University, Tianjin 300350, China

<sup>2</sup>CMA-NKU Cooperative Laboratory for Atmospheric Environment-Health Research, Tianjin 300350, China

<sup>3</sup>Department of Public Health Sciences, University of Rochester School of Medicine and Dentistry, Rochester, NY 14642, USA

<sup>4</sup>Institute for a Sustainable Environment, Clarkson University, Potsdam, NY 13699, USA

**Correspondence:** Baoshuang Liu (lbsnankai@foxmail.com) and Yinchang Feng (fengyc@nankai.edu.cn)

The copyright of individual parts of the supplement might differ from the CC BY 4.0 License.

## Contents

|                                                                                                                                                                                                                                                                                                                                                                                   |     |
|-----------------------------------------------------------------------------------------------------------------------------------------------------------------------------------------------------------------------------------------------------------------------------------------------------------------------------------------------------------------------------------|-----|
| Text S1. Estimation methods of the decay factors. ....                                                                                                                                                                                                                                                                                                                            | S3  |
| Table S1. Summary of sampling information and species concentration data from reviewed publications using PMF for VOC source analyses. ....                                                                                                                                                                                                                                       | S4  |
| Table S2. Summary of methods for reducing reactive loss impacts in the VOC source analyses. ....                                                                                                                                                                                                                                                                                  | S8  |
| Table S3. The type and quantity of input species in PMF for VOC source apportionment in the publications. ....                                                                                                                                                                                                                                                                    | S11 |
| Table S4. Summary of $k_{OH}$ values of PAMS species used in the publications. ....                                                                                                                                                                                                                                                                                               | S13 |
| Table S5. Summary of estimation methods for calculating photochemical age (reaction time, $\Delta t$ ) in the publications. ....                                                                                                                                                                                                                                                  | S15 |
| Table S6. Primary initial ratios of reference species used in different publications. ....                                                                                                                                                                                                                                                                                        | S17 |
| Table S7. Summary of relevant parameters for source analyses of OVOCs using the photochemical-age parameter method in publications. ....                                                                                                                                                                                                                                          | S18 |
| Table S8. Summary of parameter values obtained utilizing a least-squares linear fit in the photochemical-age parameter method. ....                                                                                                                                                                                                                                               | S18 |
| Table S9. Summary of publications on estimation methods of consumed VOCs (i.e., CVOCs) and models used for their source analyses. ....                                                                                                                                                                                                                                            | S20 |
| Table S10. Summary of information related to VOC measured and initial concentrations, and chemical losses in the reviewed publications. ....                                                                                                                                                                                                                                      | S21 |
| Table S11. Summary of concentrations and percentages of the consumed VOC species in the reviewed publications. ....                                                                                                                                                                                                                                                               | S22 |
| Figure S1. The measured and initial concentrations of VOC groups, and their consumed concentrations in Beijing (Gao et al., 2018; Zhan et al., 2021), Qingdao (Gu et al., 2023), Tianjin (Liu et al., 2023a), Chengdu (Kong et al., 2023), and Taipei (Chen et al., 2023) in the reviewed publications. The data of Beijing was the average value from the two publications. .... | S23 |
| References. ....                                                                                                                                                                                                                                                                                                                                                                  | S24 |

## **Text S1. Estimation methods of the decay factors.**

### **Method 1:**

In 1981, Friedlander (1981) proposed treating an urban airshed as a continuous stirred tank reactor (CSTR) and relating the decay factor for a given species to its first-order reaction rate constant,  $k_i$ .

$$\alpha_i = (1 + k_i\theta)^{-1} \quad (1)$$

$$\theta = \frac{V}{q} \quad (2)$$

where  $\alpha_i$  represents the decay factor of species  $i$ ,  $\theta$  represents the average residence time,  $V$  is the reactor volume, and  $q$  is the flow rate. This method considered only the first-order reaction of a given species, and there was high uncertainty in the average residence time.

### **Method 2:**

In 1994, Lin and Milford (1994) first estimated the decay factor utilizing the reaction rate constants of VOC species and “aging coefficients”. In 2007, Na and Pyo Kim (2007) also conducted a similar estimation utilizing this method. The specific estimation method of the decay factor ( $\alpha_{ij}$ ) was as follows:

$$\alpha_{ij} = \exp(-k_i\xi) \quad (3)$$

where  $k_i$  is the rate constant for the reaction of species  $i$  with the OH radical, and  $\xi$  is an empirically estimated “aging coefficient”. To estimate  $\xi$  for a given sample, source contributions estimated with  $\alpha_{ij} = 1.0$  were used to calculate preliminary predicted concentrations,  $c_i^*$ . With the normalized residual ( $E_i$ ) for species  $i$  defined as:

$$E_i = \frac{c_i^* - c_i}{c_i} \quad (4)$$

the linear expression:

$$\ln(E_i + 1) = -A + \xi k_i \quad (5)$$

where the  $\xi$  value can be estimated for each sample utilizing the linear regression. However, this method had two important limitations: First, for a given sample, the aging coefficient was assumed to be the same for all species and sources; second, rates of reaction of alkenes with  $\text{NO}_3$  radicals and  $\text{O}_3$  were neglected.

**Table S1.** Summary of sampling information and species concentration data from reviewed publications using PMF for VOC source analyses.

| Literature          | City/Region   | Study period                    | Unit                | TVOCs  | PAMS   | Alkanes | Alkenes | Aromatic hydrocarbons | Alkyne | OVOCs | Halohydrocarbons | Others |
|---------------------|---------------|---------------------------------|---------------------|--------|--------|---------|---------|-----------------------|--------|-------|------------------|--------|
| Ling et al. (2011)  | PRD region    | 2007/10/23-2007/12/1            | $\mu\text{gm}^{-3}$ | 81.01  | 81.01  | 27.84   | 5.08    | 43.53                 | 4.56   | -     | -                | -      |
| Chen et al. (2019)  | Taixi, Taiwan | 2014                            | ppbv                | 11.19  | 11.19  | 6.28    | 2.11    | 1.94                  | 0.86   | -     | -                | -      |
| Chen et al. (2019)  | Taixi, Taiwan | 2015                            | ppbv                | 11.58  | 11.58  | 6.67    | 1.87    | 2.12                  | 0.92   | -     | -                | -      |
| Chen et al. (2019)  | Taixi, Taiwan | 2016                            | ppbv                | 10.44  | 10.44  | 6.25    | 1.54    | 1.82                  | 0.83   | -     | -                | -      |
| Zheng et al. (2018) | Junggar Basin | 2014/9-2015/8                   | ppbv                | 145.83 | 145.83 | 129     | 9.52    | 4.28                  | 3.03   | -     | -                | -      |
| Ling and Guo (2014) | Hong Kong     | 2010/9/6-2010/11/29             | -                   | -      | -      | -       | -       | -                     | -      | -     | -                | -      |
| Tan et al. (2020)   | Chengdu       | 2017/7/31-2017/8/6              | ppbv                | 14.4   | 14.34  | 10      | 0.89    | 1.01                  | 2.44   | -     | -                | -      |
| Tan et al. (2020)   | Chengdu       | 2017/8/7-2017/8/31              | ppbv                | 11.8   | 11.77  | 6.28    | 2.57    | 0.79                  | 2.13   | -     | -                | -      |
| Tan et al. (2020)   | Chengdu       | 2017/7/31-2017/8/6              | ppbv                | 52.8   | 31.38  | 16.5    | 3.77    | 7.85                  | 3.26   | 13.3  | 7.7              | -      |
| Tan et al. (2020)   | Chengdu       | 2017/8/7-2017/8/31              | ppbv                | 34.9   | 21.9   | 12.3    | 2.79    | 4.41                  | 2.4    | 7.68  | 4.9              | -      |
| Tan et al. (2020)   | Chengdu       | 2017/7/31-2017/8/6              | ppbv                | 60.6   | 32.94  | 18.4    | 4.46    | 7.27                  | 2.81   | 20.5  | 6.7              | -      |
| Tan et al. (2020)   | Chengdu       | 2017/8/7-2017/8/31              | ppbv                | 47.0   | 32.73  | 23.7    | 3.12    | 3.32                  | 2.59   | 9.81  | 4.14             | -      |
| Brown et al. (2007) | Los Angeles   | 2001/7-9, 2002/7-9,<br>2003/7-9 | ppbC                | 79     | -      | -       | -       | -                     | -      | -     | -                | -      |
| Brown et al. (2007) | Los Angeles   | 2001/7-9, 2002/7-9,<br>2003/7-9 | ppbC                | 237    | -      | -       | -       | -                     | -      | -     | -                | -      |
| Zhang et al. (2013) | Guangzhou     | 2009/11/8-2009/12/7             | ppbv                | -      | -      | -       | -       | 9.26                  | -      | -     | -                | -      |
| Zhang et al. (2013) | Guangzhou     | 2009/11/8-2009/12/7             | ppbv                | -      | -      | -       | -       | 6.4                   | -      | -     | -                | -      |
| Zhang et al. (2013) | Zengcheng     | 2009/11/8-2009/12/7             | ppbv                | -      | -      | -       | -       | 2.5                   | -      | -     | -                | -      |
| Zhang et al. (2013) | Wanqingsha    | 2009/11/8-2009/12/7             | ppbv                | -      | -      | -       | -       | 10.4                  | -      | -     | -                | -      |

|                     |            |                         |      |       |       |       |       |      |      |       |      |      |   |
|---------------------|------------|-------------------------|------|-------|-------|-------|-------|------|------|-------|------|------|---|
| Guo et al. (2011)   | PRD center | 2007/10-2007/12         | ppbv | 42    | -     | -     | -     | -    | -    | -     | -    | -    | - |
| Guo et al. (2011)   | Hong Kong  | 2007/10-2007/13         | ppbv | 34    | -     | -     | -     | -    | -    | -     | -    | -    | - |
| Shao et al. (2016)  | Nanjing    | 2013/5/15-2013/8/31     | ppbv | 34.4  | 34.4  | 14.98 | 7.35  | 9.06 | 3.01 | -     | -    | -    | - |
| Liu et al. (2023a)  | Tianjin    | 2020/4/15-2020/8/31     | ppbv | 19.35 | 19.35 | 11.3  | 5.32  | 1.6  | 1.13 | -     | -    | -    | - |
| Hui et al. (2019)   | Wuhan      | 2016/10/15-2016/10/20   | ppbv | 58.33 | 13.23 | 18.84 | 5.9   | 4.89 | 2.44 | 20.67 | 5.11 | 0.48 |   |
| Hui et al. (2019)   | Wuhan      | 2016/11/2-2016/11/6     | ppbv | 45.84 | 32.75 | 19.79 | 5.12  | 4.81 | 3.03 | 7.26  | 5.38 | 0.45 |   |
| Hui et al. (2019)   | Wuhan      | 2016/11/11-2016/11/16   | ppbv | 57.73 | 43.87 | 26.56 | 7.58  | 5.65 | 4.08 | 7.08  | 6.24 | 0.54 |   |
| Liu et al. (2020)   | Beijing    | 2016/4; 2016/7; 2016/10 | ppbv | 44    | 27.96 | 16.2  | 5.24  | 3.39 | 3.13 | 11    | 4.76 | 0.3  |   |
| Xiong et al. (2021) | Chengdu    | 2018/6                  | ppbv | 26.8  | 22.3  | 11.9  | 3.76  | 3.18 | 3.46 | -     | 4.47 | -    |   |
| Xiong et al. (2021) | Chengdu    | 2019/1                  | ppbv | 53.3  | 49.67 | 29.2  | 6.55  | 5.46 | 8.46 | -     | 3.62 | -    |   |
| Zhu et al. (2017)   | Mt. Tai    | 2014/6/4-2014/7/4       | pptv | 8040  | 7947  | 4464  | 906   | 1179 | 1398 | -     | -    | 94   |   |
| Yang et al. (2019)  | Xianghe    | 2017/11/6-2018/1/29     | ppbv | 61.04 | 48.44 | 23.66 | 12.27 | 8.27 | 4.24 | 5.18  | 8.47 | 0.32 |   |
| Li et al. (2019)    | Zhengzhou  | 2017/5                  | ppbv | 37.6  | -     | -     | -     | -    | -    | -     | -    | -    | - |
| Li et al. (2019)    | Zhengzhou  | 2017/6                  | ppbv | 34    | -     | -     | -     | -    | -    | -     | -    | -    | - |
| Li et al. (2019)    | Zhengzhou  | 2017/7                  | ppbv | 16    | -     | -     | -     | -    | -    | -     | -    | -    | - |
| Li et al. (2019)    | Zhengzhou  | 2017/8                  | ppbv | 21.5  | -     | -     | -     | -    | -    | -     | -    | -    | - |
| Li et al. (2019)    | Zhengzhou  | 2017/9                  | ppbv | 26.2  | -     | -     | -     | -    | -    | -     | -    | -    | - |
| Li et al. (2019)    | Zhengzhou  | 2017/5                  | ppbv | 29.3  | -     | -     | -     | -    | -    | -     | -    | -    | - |
| Li et al. (2019)    | Zhengzhou  | 2017/6                  | ppbv | 30.3  | -     | -     | -     | -    | -    | -     | -    | -    | - |
| Li et al. (2019)    | Zhengzhou  | 2017/7                  | ppbv | 20.7  | -     | -     | -     | -    | -    | -     | -    | -    | - |
| Li et al. (2019)    | Zhengzhou  | 2017/8                  | ppbv | 24.4  | -     | -     | -     | -    | -    | -     | -    | -    | - |
| Li et al. (2019)    | Zhengzhou  | 2017/9                  | ppbv | 34.2  | -     | -     | -     | -    | -    | -     | -    | -    | - |

|                   |           |         |      |      |      |      |      |      |   |   |   |   |
|-------------------|-----------|---------|------|------|------|------|------|------|---|---|---|---|
| Li et al. (2019)  | Zhengzhou | 2017/5  | ppbv | 31.7 | -    | -    | -    | -    | - | - | - | - |
| Li et al. (2019)  | Zhengzhou | 2017/6  | ppbv | 39.3 | -    | -    | -    | -    | - | - | - | - |
| Li et al. (2019)  | Zhengzhou | 2017/7  | ppbv | 19.6 | -    | -    | -    | -    | - | - | - | - |
| Li et al. (2019)  | Zhengzhou | 2017/8  | ppbv | 20.5 | -    | -    | -    | -    | - | - | - | - |
| Li et al. (2019)  | Zhengzhou | 2017/9  | ppbv | 30.4 | -    | -    | -    | -    | - | - | - | - |
| Li et al. (2019)  | Zhengzhou | 2017/5  | ppbv | 30.1 | -    | -    | -    | -    | - | - | - | - |
| Li et al. (2019)  | Zhengzhou | 2017/6  | ppbv | 28.3 | -    | -    | -    | -    | - | - | - | - |
| Li et al. (2019)  | Zhengzhou | 2017/7  | ppbv | 15.9 | -    | -    | -    | -    | - | - | - | - |
| Li et al. (2019)  | Zhengzhou | 2017/8  | ppbv | 26.1 | -    | -    | -    | -    | - | - | - | - |
| Li et al. (2019)  | Zhengzhou | 2017/9  | ppbv | 32.6 | -    | -    | -    | -    | - | - | - | - |
| Liu et al. (2016) | Tianjin   | 2015/3  | ppbv | 19.6 | 19.7 | 14.2 | 4.2  | 1.3  | - | - | - | - |
| Liu et al. (2016) | Tianjin   | 2015/4  | ppbv | 22.6 | 22.5 | 15.9 | 4.3  | 2.3  | - | - | - | - |
| Liu et al. (2016) | Tianjin   | 2015/5  | ppbv | 14.4 | 14.4 | 11.1 | 2.4  | 0.9  | - | - | - | - |
| Liu et al. (2016) | Tianjin   | 2015/6  | ppbv | 10.4 | 10.5 | 7.4  | 2.3  | 0.8  | - | - | - | - |
| Liu et al. (2016) | Tianjin   | 2015/7  | ppbv | 34.5 | 34.5 | 20.1 | 4.4  | 10   | - | - | - | - |
| Liu et al. (2016) | Tianjin   | 2015/8  | ppbv | 48.9 | 49   | 21.3 | 5.9  | 21.8 | - | - | - | - |
| Liu et al. (2016) | Tianjin   | 2015/9  | ppbv | 44.8 | 45   | 30   | 5.3  | 9.7  | - | - | - | - |
| Liu et al. (2016) | Tianjin   | 2015/1  | ppbv | 31.8 | 31.9 | 19.7 | 5.3  | 6.9  | - | - | - | - |
| Liu et al. (2016) | Tianjin   | 2014/11 | ppbv | 30   | 30   | 20.5 | 5.7  | 3.8  | - | - | - | - |
| Liu et al. (2016) | Tianjin   | 2014/12 | ppbv | 26.9 | 27   | 18.2 | 6.4  | 2.4  | - | - | - | - |
| Liu et al. (2016) | Tianjin   | 2015/1  | ppbv | 39.4 | 39.4 | 26.3 | 10.2 | 2.9  | - | - | - | - |
| Liu et al. (2016) | Tianjin   | 2015/2  | ppbv | 20.9 | 20.9 | 14.3 | 5.6  | 1    | - | - | - | - |

|                        |              |                       |                     |       |       |       |      |       |      |       |      |      |
|------------------------|--------------|-----------------------|---------------------|-------|-------|-------|------|-------|------|-------|------|------|
| Guan et al. (2020)     | Shijiazhuang | 2018/7/6-2018/7/15    | ppbv                | -     | -     | -     | -    | -     | -    | -     | -    | -    |
| Gao et al. (2020)      | Yuncheng     | 2018/1/20-2018/1/24   | $\mu\text{gm}^{-3}$ | 87.7  | 84.92 | 53.5  | 8.8  | 20.02 | 2.6  | -     | -    | -    |
| Hui et al. (2020)      | Wuhan        | 2017/4/26-2017/6/6    | ppbv                | 28.92 | 21.74 | 14.79 | 2.9  | 2.25  | 1.8  | 3.8   | 3.16 | 0.22 |
| Huang and Hsieh (2020) | Taipei       | 2017                  | $\mu\text{gm}^{-3}$ | 76.0  | 76.0  | 40.9  | 7.3  | 24.7  | 3.1  | -     | -    | -    |
| Huang and Hsieh (2020) | Taipei       | 2017                  | $\mu\text{gm}^{-3}$ | 65.0  | 65.0  | 34.8  | 4.8  | 24.5  | 1.0  | -     | -    | -    |
| Huang and Hsieh (2020) | Taichung     | 2017                  | $\mu\text{gm}^{-3}$ | 64.9  | 64.9  | 30.2  | 5.5  | 27.5  | 1.8  | -     | -    | -    |
| Huang and Hsieh (2020) | Tainan       | 2017                  | $\mu\text{gm}^{-3}$ | 65.2  | 65.2  | 32.2  | 5.9  | 26.3  | 0.8  | -     | -    | -    |
| Huang and Hsieh (2020) | Kaohsiung    | 2017                  | $\mu\text{gm}^{-3}$ | 53.4  | 53.4  | 26.8  | 5.8  | 19.9  | 1.0  | -     | -    | -    |
| Huang and Hsieh (2020) | Kaohsiung    | 2017                  | $\mu\text{gm}^{-3}$ | 58.2  | 58.2  | 31.3  | 6.7  | 18.9  | 1.5  | -     | -    | -    |
| Huang and Hsieh (2020) | Yunlin       | 2017                  | $\mu\text{gm}^{-3}$ | 21.7  | 21.7  | 11.8  | 3.0  | 6.0   | 0.7  | -     | -    | -    |
| Huang and Hsieh (2020) | Chiayi       | 2017                  | $\mu\text{gm}^{-3}$ | 40.1  | 40.1  | 22.1  | 4.4  | 13.0  | 0.5  | -     | -    | -    |
| Huang and Hsieh (2020) | Pingtung     | 2017                  | $\mu\text{gm}^{-3}$ | 34.9  | 34.9  | 18.1  | 3.9  | 11.0  | 1.9  | -     | -    | -    |
| Zhao et al. (2020)     | Nanjing      | 2016                  | ppbv                | 25.7  | 25.7  | 13.6  | 3.2  | 4.4   | 4.5  | -     | -    | -    |
| Hui et al. (2021)      | Weinan       | 2019/7/1-2019/9/19    | ppbv                | 30.42 | 22.91 | 14.94 | 3.3  | 2.42  | 2.25 | 4.36  | 3.02 | 0.13 |
| Zhou et al. (2022)     | Beijing      | 2020/11/5-2020/11/14  | ppbv                | 19.43 | 11.21 | 6.84  | 1.46 | 2.05  | 0.86 | 5.52  | 2.65 | -    |
| Zhou et al. (2022)     | Beijing      | 2020/11/15-2020/11/26 | ppbv                | 16.25 | 9.35  | 5.66  | 1.36 | 1.43  | 0.9  | 4.56  | 2.31 | -    |
| Gu et al. (2022)       | Tianjin      | 2019/11/1-2020/3/31   | ppbv                | 27.6  | 27.6  | 18.6  | 4.3  | 2.5   | 2.2  | -     | -    | -    |
| Yang et al. (2022)     | Tianjin      | 2020/12/1-2021/3/15   | ppbv                | 24.2  | 24.13 | 16.5  | 3.99 | 2.18  | 1.46 | -     | -    | -    |
| Yu et al. (2023)       | Hefei        | 2020/8/18-2020/9/2    | ppbv                | 42.26 | 13.22 | 8.99  | 2.62 | 1.61  | -    | 22.13 | 5.63 | 1.3  |
| Cao et al. (2023)      | Hainan       | 2019/1-2019/12        | ppbv                | 11.4  | 11.39 | 8.15  | 1.32 | 1.03  | 0.89 | -     | -    | -    |
| Wang et al. (2023a)    | Taiyuan      | 2021/7/16-2022/1/4    | ppbv                | 21.97 | 21.97 | 13.42 | 5    | 1.57  | 1.98 | -     | -    | -    |
| Wu et al. (2023b)      | Qingdao      | 2020/3/11-2020/5/31   | $\mu\text{gm}^{-3}$ | 57.4  | 57.45 | 37.1  | 5.96 | 13.8  | 0.59 | -     | -    | -    |

|                    |           |                      |      |       |       |       |      |       |      |      |   |     |
|--------------------|-----------|----------------------|------|-------|-------|-------|------|-------|------|------|---|-----|
| Liu et al. (2023b) | Beijing   | 2019/8/1-2019/8/28   | ppbv | 94.26 | 86.6  | 53.51 | 2.53 | 29.88 | 0.68 | 7.34 | - | -   |
| Liu et al. (2023b) | Beijing   | 2019/8/1-2019/8/28   | ppbv | 20.69 | 12.27 | 8.31  | 1.21 | 2.36  | 0.39 | 8.12 | - | -   |
| Tan et al. (2021)  | Hong Kong | 2018/8/27-2018/10/10 | ppbv | 9.38  | 1.27  | -     | 0.47 | 0.8   | -    | 7.91 | - | 0.2 |

The data from the same city at different or same times were derived mainly from multiple sampling sites.

**Table S2.** Summary of methods for reducing reactive loss impacts in the VOC source analyses.

| Literature          | Models | Reduce reactive loss impact methods                               |
|---------------------|--------|-------------------------------------------------------------------|
| Ling et al. (2011)  | PMF    | Input low reactivity species                                      |
| Chen et al. (2019)  | PMF    | Input low reactivity species                                      |
| Zheng et al. (2018) | PMF    | Input low reactivity species                                      |
| Ling and Guo (2014) | PMF    | Input low reactivity species                                      |
| Tan et al. (2020)   | PMF    | Input low reactivity species                                      |
| Brown et al. (2007) | PMF    | Input low reactivity species                                      |
| Zhang et al. (2013) | PMF    | Input low reactivity species                                      |
| Guo et al. (2011)   | PMF    | Input low reactivity species                                      |
| Shao et al. (2016)  | PMF    | Input low reactivity species                                      |
| Liu et al. (2023a)  | PMF    | Input low reactivity species and calculate initial concentrations |
| Hui et al. (2019)   | PMF    | Input low reactivity species                                      |
| Liu et al. (2020)   | PMF    | Input low reactivity species                                      |
| Xiong et al. (2021) | PMF    | Input low reactivity species                                      |
| Zhu et al. (2017)   | PMF    | Input low reactivity species                                      |



|                              |     |                                                                   |
|------------------------------|-----|-------------------------------------------------------------------|
| Yang et al. (2019)           | PMF | Input low reactivity species                                      |
| Li et al. (2019)             | PMF | Input low reactivity species                                      |
| Liu et al. (2016)            | PMF | Input low reactivity species                                      |
| Guan et al. (2020)           | PMF | Input low reactivity species                                      |
| Gao et al. (2020)            | PMF | Input low reactivity species                                      |
| Hui et al. (2020)            | PMF | Input low reactivity species                                      |
| Huang and Hsieh (2020)       | PMF | Input low reactivity species                                      |
| Zhao et al. (2020)           | PMF | Input low reactivity species                                      |
| Hui et al. (2021)            | PMF | Input low reactivity species                                      |
| Zhou et al. (2022)           | PMF | Input low reactivity species                                      |
| Gu et al. (2022)             | PMF | Input low reactivity species                                      |
| Yang et al. (2022)           | PMF | Input low reactivity species and calculate initial concentrations |
| Yu et al. (2023)             | PMF | Input low reactivity species                                      |
| Cao et al. (2023)            | PMF | Input low reactivity species                                      |
| Wang et al. (2023a)          | PMF | Input low reactivity species                                      |
| Buzcu and Fraser (2006)      | PMF | Input nighttime data                                              |
| BuzcuGüven and Fraser (2008) | PMF | Input nighttime data                                              |
| Lin and Milford (1994)       | CMB | Decay factor method                                               |
| Friedlander (1981)           | CMB | Decay factor method                                               |
| Na and Pyo Kim (2007)        | CMB | Decay factor method                                               |
| He et al. (2019)             | PMF | Calculate initial concentration                                   |
| Wang et al. (2023b)          | PMF | Calculate initial concentration                                   |
| Sun et al. (2016)            | PMF | Calculate initial concentration                                   |

|                       |                                |                                                                   |
|-----------------------|--------------------------------|-------------------------------------------------------------------|
| Zou et al. (2023)     | PMF                            | Calculate initial concentration                                   |
| Wu et al. (2023a)     | PMF                            | Calculate initial concentration                                   |
| Wu et al. (2023b)     | PMF                            | Input low reactivity species and calculate initial concentrations |
| Zhu et al. (2021)     | Photochemical age-based method | /                                                                 |
| de Gouw et al. (2005) | Photochemical age-based method | /                                                                 |
| Huang et al. (2020)   | Photochemical age-based method | /                                                                 |
| Yuan et al. (2012)    | Photochemical age-based method | /                                                                 |
| Wang et al. (2016)    | Photochemical age-based method | /                                                                 |
| Han et al. (2019)     | Photochemical age-based method | /                                                                 |
| Wu et al. (2020)      | Photochemical age-based method | /                                                                 |

---

**Table S3.** The type and quantity of input species in PMF for VOC source apportionment in the publications.

| Literature             | Input Species | PAMS | Alkanes | Alkenes | Aromatic hydrocarbons | Alkyne | OVOCs | Halohydrocarbons | Others |
|------------------------|---------------|------|---------|---------|-----------------------|--------|-------|------------------|--------|
| Ling et al. (2011)     | 22            | 22   | 10      | 3       | 8                     | 1      | 0     | 0                | 0      |
| Chen et al. (2019)     | 27            | 27   | 17      | 3       | 6                     | 1      | 0     | 0                | 0      |
| Zheng et al. (2018)    | 20            | 20   | 14      | 1       | 4                     | 1      | 0     | 0                | 0      |
| Ling and Guo (2014)    | 25            | 25   | 12      | 3       | 9                     | 1      | 0     | 0                | 0      |
| Tan et al. (2020)      | 82            | 54   | 29      | 8       | 16                    | 1      | 14    | 14               | 0      |
| Brown et al. (2007)    | 31            | 31   | 19      | 2       | 9                     | 1      | 0     | 0                | 0      |
| Zhang et al. (2013)    | 33            | 33   | 13      | 6       | 13                    | 1      | 0     | 0                | 0      |
| Guo et al. (2011)      | 16            | 16   | 9       | 1       | 5                     | 1      | 0     | 0                | 0      |
| Shao et al. (2016)     | 33            | 33   | 15      | 6       | 11                    | 1      | 0     | 0                | 0      |
| Liu et al. (2023a)     | 32            | 32   | 17      | 5       | 9                     | 1      | 0     | 0                | 0      |
| Hui et al. (2019)      | 43            | 35   | 18      | 6       | 10                    | 1      | 0     | 7                | 1      |
| Liu et al. (2020)      | 39            | 31   | 15      | 6       | 9                     | 1      | 5     | 2                | 1      |
| Xiong et al. (2021)    | 30            | 26   | 14      | 3       | 8                     | 1      | 3     | 1                | 0      |
| Zhu et al. (2021)      | 28            | 28   | 14      | 4       | 9                     | 1      | 0     | 0                | 0      |
| Yang et al. (2019)     | 48            | 25   | 9       | 5       | 10                    | 1      | 7     | 15               | 1      |
| Li et al. (2019)       | 30            | 30   | 15      | 8       | 6                     | 1      | 0     | 0                | 0      |
| Liu et al. (2016)      | 31            | 31   | 17      | 5       | 9                     | 0      | 0     | 0                | 0      |
| Guan et al. (2020)     | 35            | 15   | 6       | 4       | 4                     | 1      | 12    | 7                | 1      |
| Gao et al. (2020)      | 37            | 37   | 19      | 7       | 10                    | 1      | 0     | 0                | 0      |
| Hui et al. (2020)      | 41            | 32   | 16      | 4       | 11                    | 1      | 2     | 7                | 1      |
| Huang and Hsieh (2020) | 15            | 15   | 7       | 2       | 5                     | 1      | 0     | 0                | 0      |
| Zhao et al. (2020)     | 25            | 25   | 11      | 6       | 7                     | 1      | 0     | 0                | 0      |
| Hui et al. (2021)      | 30            | 24   | 13      | 5       | 5                     | 1      | 1     | 4                | 1      |

|                     |    |    |    |   |   |   |   |   |   |
|---------------------|----|----|----|---|---|---|---|---|---|
| Zhou et al. (2022)  | 38 | 19 | 10 | 3 | 5 | 1 | 9 | 9 | 1 |
| Gu et al. (2022)    | 30 | 30 | 16 | 5 | 8 | 1 | 0 | 0 | 0 |
| Yang et al. (2022)  | 30 | 30 | 17 | 5 | 7 | 1 | 0 | 0 | 0 |
| Yu et al. (2023)    | 27 | 17 | 8  | 4 | 5 | 0 | 4 | 6 | 0 |
| Cao et al. (2023)   | 34 | 34 | 16 | 8 | 9 | 1 | 0 | 0 | 0 |
| Wang et al. (2023a) | 35 | 34 | 16 | 9 | 8 | 1 | 1 | 0 | 0 |
| Wu et al. (2023b)   | 27 | 27 | 14 | 6 | 6 | 1 | 0 | 0 | 0 |
| Li et al. (2023)    | 34 | 30 | 18 | 2 | 9 | 1 | 4 | 0 | 0 |
| Li et al. (2023)    | 24 | 20 | 14 | 2 | 4 | 0 | 4 | 0 | 0 |
| Liu et al. (2023b)  | 29 | 26 | 14 | 4 | 7 | 1 | 3 | 0 | 0 |
| Tan et al. (2021)   | 16 | 4  | 0  | 1 | 3 | 0 | 7 | 0 | 5 |

**Table S4.** Summary of  $k_{OH}$  values of PAMS species used in the publications.

| Species                | $k_{OH}$ (Carter, 2010)<br>( $\text{cm}^3 \text{ molecule}^{-1} \text{ s}^{-1}$ ) | $k_{OH}$ (Atkinson and Arey, 2003) | Species                      | $k_{OH}$ (Carter, 2010)<br>( $\text{cm}^3 \text{ molecule}^{-1} \text{ s}^{-1}$ ) | $k_{OH}$ (Atkinson and Arey, 2003) |
|------------------------|-----------------------------------------------------------------------------------|------------------------------------|------------------------------|-----------------------------------------------------------------------------------|------------------------------------|
| Temperature            | 300°K                                                                             | 298°K                              | Temperature                  | 300°K                                                                             | 298°K                              |
| <b>Alkanes</b>         |                                                                                   |                                    | <b>Alkenes</b>               |                                                                                   |                                    |
| Ethane                 | 2.54E-13                                                                          | 2.48E-13                           | Ethylene                     | 8.15E-12                                                                          | 8.52E-12                           |
| Propane                | 1.11E-12                                                                          | 1.09E-12                           | Propene                      | 2.6E-11                                                                           | 2.63E-11                           |
| i-Butane               | 2.14E-12                                                                          | -                                  | trans-2-Butene               | 6.32E-11                                                                          | 6.4E-11                            |
| n-Butane               | 2.38E-12                                                                          | 2.36E-12                           | 1-Butene                     | 3.11E-11                                                                          | 3.14E-11                           |
| 2,2-Dimethylbutane     | 2.27E-12                                                                          | 2.23E-12                           | cis-2-Butene                 | 5.58E-11                                                                          | 5.64E-11                           |
| 2,3-Dimethylbutane     | 5.79E-12                                                                          | 5.78E-12                           | 1-Pentene                    | 3.14E-11                                                                          | 3.14E-11                           |
| n-Pentane              | 3.84E-12                                                                          | 3.8E-12                            | trans-2-Pentene              | 6.7E-11                                                                           | 6.7E-11                            |
| i-Pentane              | 3.6E-12                                                                           | -                                  | cis-2-Pentene                | 6.5E-11                                                                           | 6.5E-11                            |
| Cyclopentane           | 5.02E-12                                                                          | 4.97E-12                           | Isoprene                     | 9.96E-11                                                                          | 1E-10                              |
| Methylcyclopentane     | 5.68E-12                                                                          | -                                  | 1-Hexene                     | 3.7E-11                                                                           | 3.7E-11                            |
| 2-Methylpentane        | 5.2E-12                                                                           | 5.2E-12                            | <b>Aromatic hydrocarbons</b> |                                                                                   |                                    |
| 3-Methylpentane        | 5.2E-12                                                                           | 5.2E-12                            | Benzene                      | 1.22E-12                                                                          | 1.22E-12                           |
| 2,4-Dimethylpentane    | 4.77E-12                                                                          | 4.77E-12                           | Toluene                      | 5.58E-12                                                                          | 5.63E-12                           |
| 2,3-Dimethylpentane    | 7.15E-12                                                                          | -                                  | Ethylbenzene                 | 7E-12                                                                             | 7E-12                              |
| 2,3,4-Trimethylpentane | 6.6E-12                                                                           | 6.6E-12                            | o-Xylene                     | 1.36E-11                                                                          | 1.36E-11                           |
| 2,2,4-Trimethylpentane | 3.38E-12                                                                          | 3.34E-12                           | i-Propylbenzene              | 6.3E-12                                                                           | 6.3E-12                            |
| n-Hexane               | 5.25E-12                                                                          | 5.2E-12                            | n-Propylbenzene              | 5.8E-12                                                                           | 5.8E-12                            |
| 3-Methylhexane         | 7.17E-12                                                                          | -                                  | m-Ethyltoluene               | 1.86E-11                                                                          | 1.86E-11                           |
| Methylcyclohexane      | 9.64E-12                                                                          | 9.64E-12                           | p-Ethyltoluene               | 1.18E-11                                                                          | 1.18E-11                           |
| Cyclohexane            | 7.02E-12                                                                          | 6.97E-12                           | o-Ethyltoluene               | 1.19E-11                                                                          | 1.19E-11                           |

|                 |          |          |                        |          |          |
|-----------------|----------|----------|------------------------|----------|----------|
| 2-Methylhexane  | 6.89E-12 | -        | 1,3,5-Trimethylbenzene | 5.67E-11 | 5.67E-11 |
| n-Heptane       | 6.81E-12 | 6.76E-12 | 1,2,4-Trimethylbenzene | 3.25E-11 | 3.25E-11 |
| 2-Methylheptane | 8.31E-12 | -        | 1,2,3-Trimethylbenzene | 3.27E-11 | 3.27E-11 |
| 3-Methylheptane | 8.59E-12 | -        | m-Diethylbenzene       | 0        | -        |
| n-Octane        | 8.16E-12 | 8.11E-12 | p-Diethylbenzene       | 0        | -        |
| n-Nonane        | 9.75E-12 | 9.7E-12  | Styrene                | 5.8E-11  | 5.8E-11  |
| n-Decane        | 1.1E-11  | 1.1E-11  | m-xylene               | 2.31E-11 | 2.31E-11 |
| <b>Alkyne</b>   |          |          | p-xylene               | 1.43E-11 | 1.43E-11 |
| Acetylene       | 7.56E-13 | -        |                        |          |          |

**Table S5.** Summary of estimation methods for calculating photochemical age (reaction time,  $\Delta t$ ) in the publications.

| Number | Study area            | $\Delta t$ calculation methods              | Publication Year | Literature                |
|--------|-----------------------|---------------------------------------------|------------------|---------------------------|
| 1      | Sydney                | Species ratio method                        | 1983             | Nelson and Quigley (1983) |
| 2      | Nashvill              | Sequential reaction model                   | 2001             | Stroud et al. (2001)      |
| 3      | Boston                | Species ratio and sequential reaction model | 2005             | de Gouw et al. (2005)     |
| 4      | NOAA aircraft data    | Species ratio method                        | 2007             | Parrish et al. (2007)     |
| 5      | NOAA aircraft data    | Species ratio and sequential reaction model | 2007             | Warneke et al. (2007)     |
| 6      | Beijing               | Sequential reaction model                   | 2008             | Xie et al. (2008)         |
| 7      | Beijing               | Species ratio method                        | 2011             | Shao et al. (2011)        |
| 8      | Beijing               | Species ratio method                        | 2012             | Yuan et al. (2012)        |
| 9      | Shanghai              | Species ratio method                        | 2013             | Wang et al. (2013)        |
| 10     | Heshan                | Species ratio method                        | 2016             | Wang et al. (2016)        |
| 11     | Beijing               | Species ratio method                        | 2016             | Sun et al. (2016)         |
| 12     | Beijing               | Species ratio method                        | 2018             | Gao et al. (2018)         |
| 13     | Heshan                | Species ratio method                        | 2019             | He et al. (2019)          |
| 14     | Shenzhen              | Species ratio method                        | 2019             | Huang et al. (2019)       |
| 15     | Beijing               | Species ratio method                        | 2021             | Zhan et al. (2021)        |
| 16     | Guangzhou             | Species ratio method                        | 2021             | Fang et al. (2021)        |
| 17     | Tianjin               | Species ratio method                        | 2022             | Yang et al. (2022)        |
| 18     | Beijing               | Species ratio and sequential reaction model | 2023             | Wu et al. (2023a)         |
| 19     | Handan                | Species ratio method                        | 2022             | Wei et al. (2022)         |
| 20     | Pune                  | Species ratio method                        | 2022             | Kalbande et al. (2022)    |
| 21     | Tianjin               | Species ratio method                        | 2023             | Liu et al. (2023a)        |
| 22     | Tianjin and Guangzhou | Local parameter method                      | 2023             | Wang et al. (2023b)       |
| 23     | Wuhan                 | Species ratio method                        | 2021             | Zheng et al. (2021)       |
| 24     | Tianjin               | Local parameter method                      | 2022             | Wang et al. (2022)        |

|    |           |                                   |      |                          |
|----|-----------|-----------------------------------|------|--------------------------|
| 25 | Jiaozhou  | Species ratio method              | 2023 | Wu et al. (2023b)        |
| 26 | -         | Isotopic hydrocarbon clock method | 2000 | Rudolph and Czuba (2000) |
| 27 | East Asia | Isotopic hydrocarbon clock method | 2009 | Saito et al. (2009)      |
| 28 | Toronto   | Isotopic hydrocarbon clock method | 2016 | Kornilova et al. (2016)  |
| 29 | Guangzhou | Species ratio method              | 2023 | Zou et al. (2023)        |

“Local parameter method” was defined that  $\Delta t$  was estimated based on the distributions of emission sources and wind directions around the receptor measure site.



**Table S6.** Primary initial ratios of reference species used in different publications.

| Literature            | T/B <sup>a</sup> | X/B <sup>b</sup> | E/X <sup>c</sup> | X/E <sup>d</sup> | E/O <sup>e</sup> | iB/P <sup>f</sup> | Methods                                                      | Time        |
|-----------------------|------------------|------------------|------------------|------------------|------------------|-------------------|--------------------------------------------------------------|-------------|
| de Gouw et al. (2005) | 3.7              | -                | -                | -                | -                | -                 | Based on observed data                                       | -           |
| Warneke et al. (2007) | 4.25             | -                | -                | -                | -                | -                 | Based on observed data                                       | -           |
| Yuan et al. (2012)    | -                | 2.2              | -                | -                | -                | -                 | Based on observed data                                       | 00:00-05:00 |
| Wang et al. (2013)    | -                | -                | 0.5              | -                | -                | -                 | Based on emission inventory                                  | -           |
| Wang et al. (2016)    | -                | -                | -                | 2.0              | -                | -                 | Based on source profiles                                     | -           |
| Sun et al. (2016)     | -                | -                | -                | 1.8              | -                | -                 | Based on observed data                                       | 00:00-05:00 |
| Gao et al. (2018)     | -                | -                | -                | 0.39             | 1.32             | -                 | Based on observed data                                       | -           |
| He et al. (2019)      | -                | -                | 0.62             | -                | -                | -                 | Based on observed data                                       | 00:00-05:00 |
| Han et al. (2020)     | -                | -                | -                | 1.04             | -                | -                 | Based on observed data                                       | 00:00-06:00 |
| Fang et al. (2021)    | -                | -                | 0.5              | -                | -                | -                 | Based on observed data                                       | 00:00-04:00 |
| Yang et al. (2022)    | 3.14             | -                | -                | -                | -                | -                 | Based on observed data                                       | 20:00-05:00 |
| Wu et al. (2023a)     | -                | -                | -                | 2.47             | -                | -                 | Based on observed data                                       | -           |
| Liu et al. (2023a)    | -                | -                | 0.22             | -                | -                | -                 | Based on observed data                                       | 00:00-05:00 |
| Kong et al. (2022)    | -                | -                | 0.23             | -                | -                | -                 | Based on observed data                                       | 21:00-02:00 |
| Li et al. (2021)      | -                | -                | 0.75             | -                | -                | -                 | Based on observed data                                       | 03:00-07:00 |
| Zou et al. (2021)     | -                | -                | 0.50             | -                | 1.30             | -                 | Based on observed data                                       | 19:00-06:00 |
| Shao et al. (2011)    | -                | -                | -                | -                | -                | -                 | Based on observed NO <sub>x</sub> /NO <sub>y</sub> >80% data | -           |
| Zou et al. (2023)     | -                | -                | -                | 2.0              | -                | -                 | Based on summer observed data                                | 20:00-06:00 |
| Zou et al. (2023)     | -                | -                | -                | 1.8              | -                | -                 | Based on autumn observed data                                | 20:00-06:00 |

<sup>a</sup>denotes Toluene/Benzene; <sup>b</sup>denotes m,p-Xylene/Benzene; <sup>c</sup>denotes Ethylbenzene/m,p-Xylene; <sup>d</sup>denotes Ethylbenzene/m,p-Xylene; <sup>e</sup>denotes Ethylbenzene/o-Xylene;

<sup>f</sup>denotes i-Butene/Propene

**Table S7.** Summary of relevant parameters for source analyses of OVOCs using the photochemical-age parameter method in publications.

| City                 | Tracer species | Methods to determine parameters | Literature            |
|----------------------|----------------|---------------------------------|-----------------------|
| Shenzhen             | Benzene        | linear least-squares fits       | Zhu et al. (2021)     |
| NEAQS data           | Acetylene      | linear least-squares fit        | de Gouw et al. (2005) |
| Beijing and Shenzhen | Benzene        | least-squares fit               | Huang et al. (2020)   |
| Beijing              | Acetylene      | least-squares fit               | Yuan et al. (2012)    |
| Heshan               | CO             | least-squares fit               | Wang et al. (2016)    |
| Wangdu               | Benzene        | linear least-squares fits       | Han et al. (2019)     |
| Guangzhou            | Acetylene      | linear least-squares fits       | Wu et al. (2020)      |

**Table S8.** Summary of parameter values obtained utilizing a least-squares linear fit in the photochemical-age parameter method.

|                                      | $ER_{OVOC}$                                              | $ER_{precursor}$ | $k_{OVOC}$                                                               | $k_{precursor}$ | $ER_{biogenic}$                    | [background] |
|--------------------------------------|----------------------------------------------------------|------------------|--------------------------------------------------------------------------|-----------------|------------------------------------|--------------|
|                                      | ppbv [ppbv C <sub>2</sub> H <sub>2</sub> ] <sup>-1</sup> |                  | 10 <sup>-12</sup> cm <sup>3</sup> molecule <sup>-1</sup> s <sup>-1</sup> |                 | ppbv [ppbv isoprene] <sup>-1</sup> | pptv         |
| <b>Beijing</b> (Huang et al., 2020)  |                                                          |                  |                                                                          |                 |                                    |              |
| Methanol                             | 16.95                                                    | 3.04             | 0.94                                                                     | 3.12            | 1.92                               | 3.95         |
| Formaldehyde                         | 3.14                                                     | 9.39             | 9.7                                                                      | 8.15            | 1.34                               | 1.25         |
| Acetaldehyde                         | 1.85                                                     | 6.89             | 15                                                                       | 4.45            | 0.69                               | 0.48         |
| Acetone                              | 1.09                                                     | 4.26             | 0.17                                                                     | 4.76            | 0.63                               | 1.36         |
| MEK                                  | 0.72                                                     | 3.89             | 1.22                                                                     | 1.26            | 0.14                               | 0.08         |
| <b>Shenzhen</b> (Huang et al., 2020) |                                                          |                  |                                                                          |                 |                                    |              |
| Methanol                             | 16.43                                                    | 8.42             | 0.94                                                                     | 7.96            | 1.24                               | 1.01         |
| Formaldehyde                         | 1.14                                                     | 15.69            | 9.7                                                                      | 8.63            | 0.8                                | 0.24         |
| Acetaldehyde                         | 0.71                                                     | 14.12            | 15                                                                       | 14.74           | 0.53                               | 0.1          |

|                                          |             |         |      |         |             |           |
|------------------------------------------|-------------|---------|------|---------|-------------|-----------|
| Acetone                                  | 1.51        | 13.31   | 0.17 | 14.51   | 0.64        | 0.81      |
| MEK                                      | 1.16        | 8.97    | 1.22 | 9.51    | 0.14        | 0.06      |
| <b>NEAQS data</b> (de Gouw et al., 2005) |             |         |      |         |             |           |
| Acetaldehyde                             | 0.83±0.07   | 6.9±0.9 | 15   | 2.3±0.4 | 0.063±0.004 | 150±10    |
| Propanal                                 | 0.24±0.02   | 3±1     | 20   | 1.3±0.4 | 0.010±0.001 | 22±5      |
| Acetone                                  | 1.2±0.2     | 1.6±0.5 | 0.17 | 4±3     | 0.23±0.01   | 960±40    |
| MEK                                      | 0.26±0.02   | 1±2     | 1.22 | 7±2     | 0.031±0.001 | 31±5      |
| Methanol                                 | 2.3±0.2     | 0       | 0.94 | 0       | 0.44±0.02   | 1280±70   |
| Ethanol                                  | 0.96±0.04   | 0       | 3.2  | 0       | 0.022±0.005 | 90±10     |
| Formic acid                              | 0           | 2.1±0.5 | 0.4  | 6±3     | 0.26±0.03   | 150±90    |
| Acetic acid                              | 0.0±0.4     | 1.8±0.4 | 0.8  | 7±4     | 0.19±0.02   | 90±70     |
| <b>Beijing</b> (Yuan et al., 2012)       |             |         |      |         |             |           |
| Formaldehyde                             | 0.72±0.11   | 6.4     | 9.4  | 2.87    | 0.98±0.07   | 0.94±0.21 |
| Acetaldehyde                             | 0.72±0.05   | 3.45    | 15   | 2.41    | 0.17±0.03   | 0.29±0.10 |
| Propanal                                 | 0.02±0.02   | 2.04    | 20   | 2.45    | 0.14± 0.01  | 0.31±0.03 |
| n-Butanal                                | 0.002±0.005 | 1.66    | 24   | 0.58    | 0.04±0.00   | 0.10±0.01 |
| Acetone                                  | 0.57±0.05   | 1.47    | 0.17 | 1.05    | 0.18±0.03   | 1.98±0.09 |
| MEK                                      | 0.31±0.01   | 0       | 1.22 | 0       | 0.07±0.01   | 0.06±0.04 |
| Methanol                                 | 3.43±0.11   | 0       | 0.94 | 0       | 0.02 ± 0.11 | 5.76±0.37 |

**Table S9.** Summary of publications on estimation methods of consumed VOCs (i.e., CVOCs) and models used for their source analyses.

| Literature               | Publication Year | Calculation Methods            | Apportionment Methods |
|--------------------------|------------------|--------------------------------|-----------------------|
| Ma et al. (2022)         | 2022             | Difference method              | -                     |
| Gao et al. (2018)        | 2018             | Difference method              | -                     |
| Gu et al. (2023)         | 2023             | Difference method              | PMF                   |
| Zhan et al. (2021)       | 2021             | Difference method              | -                     |
| Chen et al. (2023)       | 2023             | Difference method              | -                     |
| Wang et al. (2013)       | 2013             | Difference method              | -                     |
| Liu et al. (2023a)       | 2023             | Difference method              | PMF                   |
| Wang et al. (2023b)      | 2023             | Difference method              | PMF/ME2-SR            |
| Xie et al. (2008)        | 2008             | Isoprene loss reference method | -                     |
| Wang et al. (2022)       | 2022             | Difference method              | PMF/ME2-SR            |
| Wiedinmyer et al. (2001) | 2001             | Isoprene loss reference method | -                     |
| Kong et al. (2023)       | 2023             | Difference method              | PMF                   |

**Table S10.** Summary of information related to VOC measured and initial concentrations, and chemical losses in the reviewed publications.

| City                           | Study period    | Season        | Initial concentration<br>calculated time (LT) | Numbers<br>of species | TVOC conc. (ppbv) |                 |                 | CL rate <sup>d</sup><br>(%) |
|--------------------------------|-----------------|---------------|-----------------------------------------------|-----------------------|-------------------|-----------------|-----------------|-----------------------------|
|                                |                 |               |                                               |                       | OC <sup>a</sup>   | IC <sup>b</sup> | CL <sup>c</sup> |                             |
| Beijing (Gao et al., 2018)     | 2013/03-2013/04 | Spring        | 08:30-09:00 and 13:30-14:00                   | 90                    | 64.9              | 72.6            | 7.72            | 10.6                        |
| Qingdao (Gu et al., 2023)      | 2022/06-2022/08 | Summer        | 06:00-19:00                                   | 89                    | 19.8              | 45.4            | 45.1            | 69.1                        |
| Beijing (Zhan et al., 2021)    | 2019/08         | Summer        | -                                             | 51                    | 11.2              | 14.6            | 3.40            | 23.3                        |
| Taipei (Chen et al., 2023)     | 2020/03-2020/05 | Spring        | 07:00-17:00                                   | 54                    | 27.6              | 31.8            | 4.21            | 13.2                        |
| Taipei (Chen et al., 2023)     | 2020/06-2020/08 | Summer        | 07:00-17:00                                   | 54                    | 22.0              | 30.3            | 8.29            | 27.3                        |
| Taipei (Chen et al., 2023)     | 2020/09-2020/11 | Autumn        | 07:00-17:00                                   | 54                    | 20.6              | 22.1            | 1.48            | 6.71                        |
| Taipei (Chen et al., 2023)     | 2020/12-2021/02 | Winter        | 07:00-17:00                                   | 54                    | 24.8              | 25.6            | 0.76            | 2.97                        |
| Tianjin (Liu et al., 2023a)    | 2020/04-2020/08 | Spring-Summer | 06:00-23:00                                   | 54                    | 19.4              | -               | 17.8            | 56.5                        |
| Beijing (Ma et al., 2022)      | 2019/01-2019/12 | Year          | 00:00-23:00                                   | 56                    | 18.6              | 24.5            | 6.90            | 28.2                        |
| Tianjin (Wang et al., 2023b)   | 2018            | Year          | -                                             | -                     | 21.4              | 24.3            | 2.90            | 11.9                        |
| Guangzhou (Wang et al., 2023b) | 2020            | Year          | -                                             | -                     | 29.6              | 34.8            | 5.20            | 14.9                        |
| Shanghai (Wang et al., 2013)   | 2009            | Year          | 08:00-18:00                                   | -                     | 26.4              | 35.4            | 9.00            | 25.4                        |
| Shanghai (Wang et al., 2013)   | 2010            | Year          | 08:00-18:00                                   | -                     | 24.5              | 34.1            | 9.60            | 28.2                        |
| Chengdu (Kong et al., 2023)    | 2019            | Spring        | 00:00-23:00                                   | 56                    | 19.4              | 26.0            | 6.60            | 25.4                        |
| Chengdu (Kong et al., 2023)    | 2019            | Summer        | 00:00-23:00                                   | 56                    | 19.3              | 25.1            | 5.90            | 23.5                        |
| Chengdu (Kong et al., 2023)    | 2019            | Autumn        | 00:00-23:00                                   | 56                    | 23.5              | 26.6            | 3.10            | 11.7                        |
| Chengdu (Kong et al., 2023)    | 2019            | Winter        | 00:00-23:00                                   | 56                    | 33.6              | 35.9            | 2.30            | 6.41                        |

<sup>a</sup> denotes observation concentrations; <sup>b</sup> denotes initial concentrations; <sup>c</sup> denotes chemical loss; <sup>d</sup> denotes the chemical loss rate (i.e., chemical loss/initial concentration).

**Table S11.** Summary of concentrations and percentages of the consumed VOC species in the reviewed publications.

| City                        | Studied period  | Season        | Alkanes                      |                          | Alkenes         |             | Aromatic hydrocarbons |             | Alkyne          |             | OVOCs           |             | Halo-hydrocarbons |             |
|-----------------------------|-----------------|---------------|------------------------------|--------------------------|-----------------|-------------|-----------------------|-------------|-----------------|-------------|-----------------|-------------|-------------------|-------------|
|                             |                 |               | Conc. <sup>a</sup><br>(ppbv) | Per. <sup>b</sup><br>(%) | Conc.<br>(ppbv) | Per.<br>(%) | Conc.<br>(ppbv)       | Per.<br>(%) | Conc.<br>(ppbv) | Per.<br>(%) | Conc.<br>(ppbv) | Per.<br>(%) | Conc.<br>(ppbv)   | Per.<br>(%) |
| Beijing (Gao et al., 2018)  | 2013/03-2013/04 | Spring        | 0.83                         | 10.7                     | 5.26            | 68.0        | 1.51                  | 19.5        | 0.13            | 1.68        | -               | -           | -                 | -           |
| Qingdao (Gu et al., 2023)   | 2022/06-2022/08 | Summer        | 1.05                         | 2.33                     | 42.1            | 93.3        | 1.72                  | 3.81        | 0.02            | 0.04        | 0.21            | 0.5         | 0.04              | 0.1         |
| Beijing (Zhan et al., 2021) | 2019/08         | Summer        | 0.21                         | 6.18                     | 2.74            | 80.6        | 0.45                  | 13.2        | 0.00            | 0.00        | -               | -           | -                 | -           |
| Taipei (Chen et al., 2023)  | 2020/03-2020/05 | Spring        | 0.53                         | 12.8                     | 2.52            | 61.2        | 1.03                  | 25.1        | 0.04            | 0.85        | -               | -           | -                 | -           |
| Taipei (Chen et al., 2023)  | 2020/06-2020/08 | Summer        | 0.55                         | 6.61                     | 6.51            | 78.6        | 1.20                  | 14.5        | 0.03            | 0.30        | -               | -           | -                 | -           |
| Taipei (Chen et al., 2023)  | 2020/09-2020/11 | Autumn        | 0.19                         | 12.5                     | 0.91            | 61.0        | 0.39                  | 25.8        | 0.01            | 0.67        | -               | -           | -                 | -           |
| Taipei (Chen et al., 2023)  | 2020/12-2021/02 | Winter        | 0.12                         | 15.7                     | 0.42            | 55.4        | 0.21                  | 27.5        | 0.01            | 1.33        | -               | -           | -                 | -           |
| Tianjin (Liu et al., 2023a) | 2020/04-2020/08 | Spring/Summer | 1.43                         | 8.21                     | 15.2            | 87.3        | 0.75                  | 4.31        | 0.03            | 0.17        | -               | -           | -                 | -           |
| Chengdu (Kong et al., 2023) | 2019/01-2019/12 | Spring        | 0.60                         | 9.23                     | 5.00            | 76.9        | 0.90                  | 13.8        | 0.00            | 0.00        | -               | -           | -                 | -           |
| Chengdu (Kong et al., 2023) | 2019/01-2019/12 | Summer        | 0.70                         | 11.9                     | 3.40            | 57.6        | 1.80                  | 30.5        | 0.00            | 0.00        | -               | -           | -                 | -           |
| Chengdu (Kong et al., 2023) | 2019/01-2019/12 | Autumn        | 0.50                         | 16.1                     | 1.40            | 45.2        | 1.20                  | 38.7        | 0.00            | 0.00        | -               | -           | -                 | -           |
| Chengdu (Kong et al., 2023) | 2019/01-2019/12 | Winter        | 0.50                         | 22.7                     | 1.30            | 59.1        | 0.40                  | 18.2        | 0.00            | 0.00        | -               | -           | -                 | -           |

<sup>a</sup> denotes consumed concentrations; <sup>b</sup> denotes percentages of consumed concentrations of different species in total consumed concentrations.

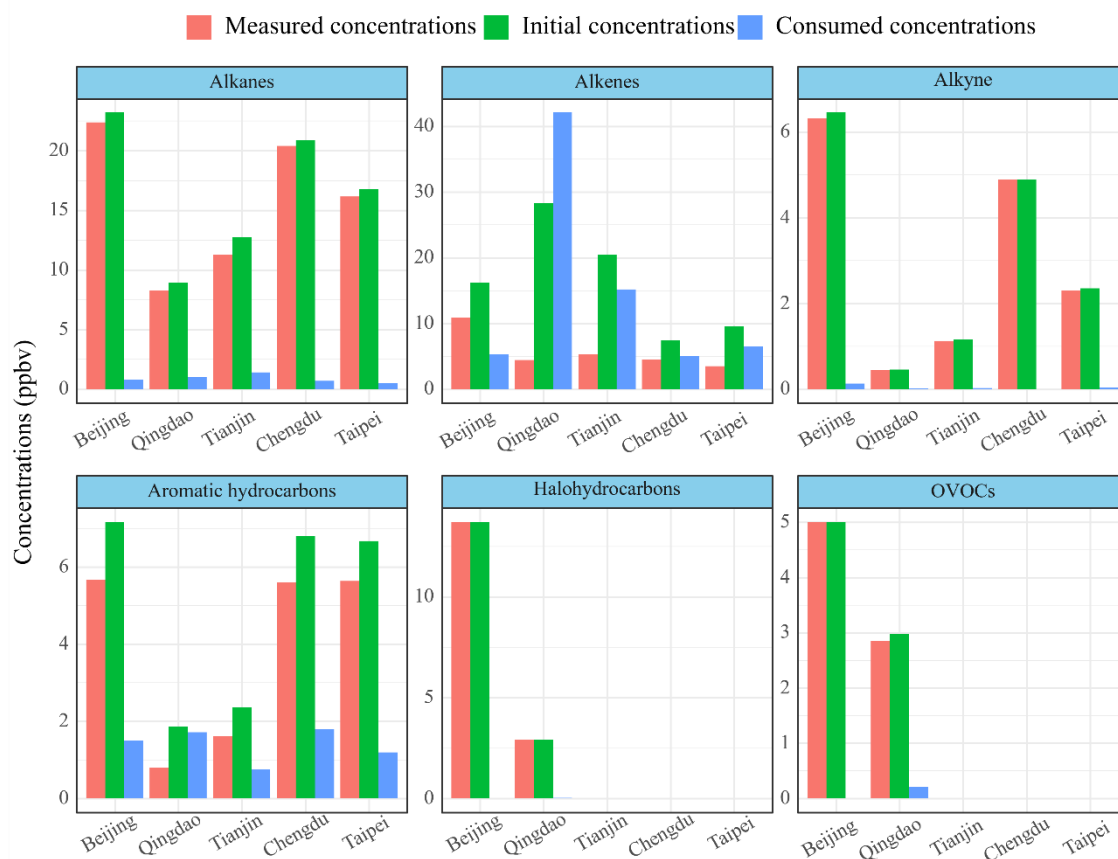

**Figure S1.** The measured and initial concentrations of VOC groups, and their consumed concentrations in Beijing (Gao et al., 2018; Zhan et al., 2021), Qingdao (Gu et al., 2023), Tianjin (Liu et al., 2023a), Chengdu (Kong et al., 2023), and Taipei (Chen et al., 2023) in the reviewed publications. The data of Beijing was the average value from the two publications.

## References

- Atkinson, R., and Arey, J.: Atmospheric degradation of volatile organic compounds, *Chem. Rev.*, 103, 4605-4638, <https://doi.org/10.1002/chin.200410285>, 2003.
- Brown, S. G., Frankel, A., and Hafner, H. R.: Source apportionment of VOCs in the Los Angeles area using positive matrix factorization, *Atmos. Environ.*, 41, 227-237, <https://doi.org/10.1016/j.atmosenv.2006.08.021>, 2007.
- Buzcu, B., and Fraser, M. P.: Source identification and apportionment of volatile organic compounds in Houston, TX, *Atmos. Environ.*, 40, 2385-2400, <https://doi.org/10.1016/j.atmosenv.2005.12.020>, 2006.
- BuzcuGüven, B., and Fraser, M. P.: Comparison of VOC emissions inventory data with source apportionment results for Houston, TX, *Atmos. Environ.*, 42, 5032-5043, <https://doi.org/10.1016/j.atmosenv.2008.02.025>, 2008.
- Cao, X. C., Xing, Q., Hu, S. H., Xu, W. S., Xie, R. F., Xian, A. D., Xie, W. J., Yang, Z. H., and Wu, X. C.: Characterization, reactivity, source apportionment, and potential source areas of ambient volatile organic compounds in a typical tropical city, *J. Environ. Sci.*, 123, 417-429, <https://doi.org/10.1016/j.jes.2022.08.005>, 2023.
- Carter, W. P. L.: Development of the SAPRC-07 chemical mechanism, *Atmos. Environ.*, 44, 5324-5335, <https://doi.org/10.1016/j.atmosenv.2010.01.026>, 2010.
- Chen, C., Chuang, Y., Hsieh, C., and Lee, C.: VOC characteristics and source apportionment at a PAMS site near an industrial complex in central Taiwan, *Atmos. Pollut. Res.*, 10, 1060-1074, <https://doi.org/10.1016/j.apr.2019.01.014>, 2019.
- Chen, Z.-W., Ting, Y.-C., Huang, C.-H., and Ciou, Z.-J.: Sources-oriented contributions to ozone and secondary organic aerosol formation potential based on initial VOCs in an urban area of Eastern Asia, *Sci. Total Environ.*, 892, 164392, <https://doi.org/10.1016/j.scitotenv.2023.164392>, 2023.
- de Gouw, J. A., Middlebrook, A. M., Warneke, C., Goldan, P. D., Kuster, W. C., Roberts, J. M., Fehsenfeld, F. C., Worsnop, D. R., Canagaratna, M. R., Pszenny, A. A. P., Keene, W. C., Marchewka, M., Bertman, S. B., and Bates, T. S.: Budget of organic carbon in a polluted atmosphere: Results from the New England Air Quality Study in 2002, *J. Geophys. Res.*, 110, D16305, <https://doi.org/10.1029/2004JD005623>, 2005.
- Fang, H., Luo, S. L., Huang, X. Q., Fu, X. W., Xiao, S. X., Zeng, J. Q., Wang, J., Zhang, Y. L., and Wang, X. M.: Ambient naphthalene and methylnaphthalenes observed at an urban site in the Pearl River Delta region: Sources and contributions to secondary organic aerosol, *Atmos. Environ.*, 252, 118295, <https://doi.org/10.1016/j.atmosenv.2021.118295>, 2021.
- Friedlander, S. K.: New Developments in Receptor Modeling Theory. In *Atmospheric Aerosol: Source/Air Quality Relationships*, Macias, E. S., Hopke, P. K., Eds., ACS Symposium Series No. 167, American Chemical Society: Washington, 1-19, 1981.



- Gao, J., Zhang, J., Li, H., Li, L., Xu, L. H., Zhang, Y. J., Wang, Z. S., Wang, X. Z., Zhang, W. Q., Chen, Y. Z., Cheng, X., Zhang, H., Peng, L., Chai, F. H., and Wei, Y. J.: Comparative study of volatile organic compounds in ambient air using observed mixing ratios and initial mixing ratios taking chemical loss into account - A case study in a typical urban area in Beijing, *Sci. Total Environ.*, 628-629, 791-804, <https://doi.org/10.1016/j.scitotenv.2018.01.175>, 2018.
- Gao, Q. Z., Yan, Y. L., Li, R. M., Xu, Y., Niu, Y. Y., Liu, C. L., Xie, K., Chang, Z. W., Hu, D. M., Li, Z. Y., and Peng, L.: Characteristics of volatile organic compounds during different pollution periods in winter in Yuncheng, a typical city in north China, *Aerosol Air Qual. Res.*, 20, 97-107, <https://doi.org/10.4209/aaqr.2019.08.0402>, 2020.
- Gu, Y., Liu, B. S., Dai, Q. L., Zhang, Y. F., Zhou, M., Feng, Y. C., and Hopke, P. K.: Multiply improved positive matrix factorization for source apportionment of volatile organic compounds during the COVID-19 shutdown in Tianjin, China, *Environ. Int.*, 158, 106979, <https://doi.org/10.1016/j.envint.2021.106979>, 2022.
- Gu, Y., Liu, B., Meng, H., Song, S., Dai, Q., Shi, L., Feng, Y., and Hopke, P. K.: Source apportionment of consumed volatile organic compounds in the atmosphere, *J. Haz. Mat.*, 459, 132138, <https://doi.org/10.1016/j.jhazmat.2023.132138>, 2023.
- Guan, Y., Wang, L., Wang, S., Zhang, Y., Xiao, J., Wang, X., Duan, E., and Hou, L. a.: Temporal variations and source apportionment of volatile organic compounds at an urban site in Shijiazhuang, China, *J. Environ. Sci.*, 97, 25-34, <https://doi.org/10.1016/j.jes.2020.04.022>, 2020.
- Guo, H., Cheng, H. R., Ling, Z. H., Louie, P. K. K., and Ayoko, G. A.: Which emission sources are responsible for the volatile organic compounds in the atmosphere of Pearl River Delta?, *J. Haz. Mat.*, 188, 116-124, <https://doi.org/10.1016/j.jhazmat.2011.01.081>, 2011.
- Han, T., Li, Y., Qiu, Y., He, D., Wang, G., and Ma, Z.: Characteristics of VOCs and their roles in ozone formation at a regional background site in Beijing, China, *Environ. Sci. (in Chinese)*, 41, 2586-2595, <https://doi.org/10.13227/j.hjx.201912032>, 2020.
- Han, Y., Huang, X. F., Wang, C., Zhu, B., and He, L. Y.: Characterizing oxygenated volatile organic compounds and their sources in rural atmospheres in China, *J. Environ. Sci.*, 81, 148-155, <https://doi.org/10.1016/j.jes.2019.01.017>, 2019.
- He, Z. R., Wang, X. M., Ling, Z. H., Zhao, J., Guo, H., Shao, M., and Wang, Z.: Contributions of different anthropogenic volatile organic compound sources to ozone formation at a receptor site in the Pearl River Delta region and its policy implications, *Atmos. Chem. Phys.*, 19, 8801-8816, <https://doi.org/10.5194/acp-19-8801-2019>, 2019.
- Huang, X.-F., Wang, C., Zhu, B., Lin, L.-L., and He, L.-Y.: Exploration of sources of OVOCs in various atmospheres in southern China, *Environ. Pollut.*, 249, 831-842, <https://doi.org/10.1016/j.envpol.2019.03.106>, 2019.

- Huang, X.-F., Zhang, B., Xia, S.-Y., Han, Y., Wang, C., Yu, G.-H., and Feng, N.: Sources of oxygenated volatile organic compounds (OVOCs) in urban atmospheres in North and South China, *Environ. Pollut.*, 261, 114152, <https://doi.org/10.1016/j.envpol.2020.114152>, 2020.
- Huang, Y. S., and Hsieh, C. C.: VOC characteristics and sources at nine photochemical assessment monitoring stations in western Taiwan, *Atmos. Environ.*, 240, 117741, <https://doi.org/10.1016/j.atmosenv.2020.117741>, 2020.
- Hui, L., Liu, X., Tan, Q., Feng, M., An, J., Qu, Y., Zhang, Y., Deng, Y., Zhai, R., and Wang, Z.: VOC characteristics, chemical reactivity and sources in urban Wuhan, central China, *Atmos. Environ.*, 224, 117340, <https://doi.org/10.1016/j.atmosenv.2020.117340>, 2020.
- Hui, L., Ma, T., Gao, Z., Gao, J., Wang, Z., Xue, L., Liu, H., and Liu, J.: Characteristics and sources of volatile organic compounds during high ozone episodes: A case study at a site in the eastern Guanzhong Plain, China, *Chemosphere*, 265, 129072, <https://doi.org/10.1016/j.chemosphere.2020.129072>, 2021.
- Hui, L. R., Liu, X. G., Tan, Q. W., Feng, M., An, J. L., Qu, Y., Zhang, Y. H., and Cheng, N. L.: VOC characteristics, sources and contributions to SOA formation during haze events in Wuhan, Central China, *Sci. Total Environ.*, 650, 2624-2639, <https://doi.org/10.1016/j.scitotenv.2018.10.029>, 2019.
- Kalbande, R., Yadav, R., Maji, S., Rathore, D. S., and Beig, G.: Characteristics of VOCs and their contribution to O<sub>3</sub> and SOA formation across seasons over a metropolitan region in India, *Atmos. Pollut. Res.*, 13, 101515, <https://doi.org/10.1016/j.apr.2022.101515>, 2022.
- Kong, C., Wu, Y., Gu, Y., Song, J., Meng, H., Shi, L., and Liu, B.: Source apportionment of ambient VOCs in Qingdao based on photochemical losses correction, *Environ. Sci. (in Chinese)*, 44, 6551-6563, <https://doi.org/10.13227/j.hjcx.202212008>, 2022.
- Kong, L., Zhou, L., Chen, D. Y., Luo, L., Xiao, K., Chen, Y., Liu, H. F., Tan, Q. W., and Yang, F. M.: Atmospheric oxidation capacity and secondary pollutant formation potentials based on photochemical loss of VOCs in a megacity of the Sichuan Basin, China, *Sci. Total Environ.*, 901, 166259, <https://doi.org/10.1016/j.scitotenv.2023.166259>, 2023.
- Kornilova, A., Huang, L., Saccon, M., and Rudolph, J.: Stable carbon isotope ratios of ambient aromatic volatile organic compounds, *Atmos. Chem. Phys.*, 16, 11755-11772, <https://doi.org/10.5194/acp-16-11755-2016>, 2016.
- Li, B. W., Ho, S. S. H., Gong, S. L., Ni, J. W., Li, H. R., Han, L. Y., Yang, Y., Qi, Y. J., and Zhao, D. X.: Characterization of VOCs and their related atmospheric processes in a central Chinese city during severe ozone pollution periods, *Atmos. Chem. Phys.*, 19, 617-638, <https://doi.org/10.5194/acp-19-617-2019>, 2019.

- Li, B. W., Yu, S. C., Shao, M., Li, X. H., Ho, S. S. H., Hu, X. Y., Wang, H. L., Feng, R., and Fang, X. K.: New insights into photochemical initial concentrations of VOCs and their source implications, *Atmos. Environ.*, 298, 119616, <https://doi.org/10.1016/j.atmosenv.2023.119616>, 2023.
- Li, R., Yan, Y., Wang, C., Xu, Y., Li, Y., and Peng, L.: Source apportionment of VOCs and its contribution to O<sub>3</sub> production during summertime in urban area of Taiyuan, China *Environ. Sci.* (in Chinese), 41, 2515-2525, <https://doi.org/10.19674/j.cnki.issn1000-6923.2021.0263>, 2021.
- Lin, C., and Milford, D. B.: Decay-adjusted chemical mass balance receptor modeling for volatile organic compounds, *Atmos. Environ.*, 28, 3261-3276, [https://doi.org/10.1016/1352-2310\(94\)00163-F](https://doi.org/10.1016/1352-2310(94)00163-F), 1994.
- Ling, Z. H., Guo, H., Cheng, H. R., and Yu, Y. F.: Sources of ambient volatile organic compounds and their contributions to photochemical ozone formation at a site in the Pearl River Delta, southern China, *Environ. Pollut.*, 159, 2310-2319, <https://doi.org/10.1016/j.envpol.2011.05.001>, 2011.
- Ling, Z. H., and Guo, H.: Contribution of VOC sources to photochemical ozone formation and its control policy implication in Hong Kong, *Environ. Sci. Policy*, 38, 180-191, <https://doi.org/10.1016/j.envsci.2013.12.004>, 2014.
- Liu, B. S., Liang, D. N., Yang, J. M., Dai, Q. L., Bi, X. H., Feng, Y. C., Yuan, J., Xiao, Z. M., Zhang, Y. F., and Xu, H.: Characterization and source apportionment of volatile organic compounds based on 1-year of observational data in Tianjin, China, *Environ. Pollut.*, 218, 757-769, <https://doi.org/10.1016/j.envpol.2016.07.072>, 2016.
- Liu, B. S., Yang, Y., Yang, T., Dai, Q. L., Zhang, Y. F., Feng, Y. C., and Hopke, P. K.: Effect of photochemical losses of ambient volatile organic compounds on their source apportionment, *Environ. Int.*, 172, 107766, <https://doi.org/10.1016/j.envint.2023.107766>, 2023a.
- Liu, C. T., Xin, Y. Y., Zhang, C. L., Liu, J. F., Liu, P. F., He, X. W., and Mu, Y. J.: Ambient volatile organic compounds in urban and industrial regions in Beijing: Characteristics, source apportionment, secondary transformation and health risk assessment, *Sci. Total Environ.*, 855, 158873, <https://doi.org/10.1016/j.scitotenv.2022.158873>, 2023b.
- Liu, Y. F., Song, M. D., Liu, X. G., Zhang, Y. P., Hui, L. R., Kong, L. W., Zhang, Y. Y., Zhang, C., Qu, Y., An, J. L., Ma, D. P., Tan, Q. W., and Feng, M.: Characterization and sources of volatile organic compounds (VOCs) and their related changes during ozone pollution days in 2016 in Beijing, China, *Environ. Pollut.*, 257, 113599, <https://doi.org/10.1016/j.envpol.2019.113599>, 2020.
- Ma, W., Feng, Z. M., Zhan, J. L., Liu, Y. C., Liu, P. F., Liu, C. T., Ma, Q. X., Yang, K., Wang, Y. F., He, H., Kulmala, M., Mu, Y. J., and Liu, J. F.: Influence of photochemical loss of volatile organic compounds on understanding ozone formation mechanism, *Atmos. Chem. Phys.*, 22, 4841-4851, <https://doi.org/10.5194/acp-22-4841-2022>, 2022.

- Na, K., and Pyo Kim, Y.: Chemical mass balance receptor model applied to ambient C<sub>2</sub>–C<sub>9</sub> VOC concentration in Seoul, Korea: Effect of chemical reaction losses, *Atmos. Environ.*, 41, 6715-6728, <https://doi.org/10.1016/j.atmosenv.2007.04.054>, 2007.
- Nelson, P. F., and Quigley, S. M.: The m,p-xylenes:ethylbenzene ratio. A technique for estimating hydrocarbon age in ambient atmospheres, *Atmos. Environ.*, 17, 659-662, [https://doi.org/10.1016/0004-6981\(83\)90141-5](https://doi.org/10.1016/0004-6981(83)90141-5), 1983.
- Parrish, D. D., Stohl, A., Forster, C., Atlas, E. L., Blake, D. R., Goldan, P. D., Kuster, W. C., and de Gouw, J. A.: Effects of mixing on evolution of hydrocarbon ratios in the troposphere, *J. Geophys. Res. Atmos.*, 112, D10S34, <https://doi.org/10.1029/2006jd007583>, 2007.
- Rudolph, J., and Czuba, E.: On the use of isotopic composition measurements of volatile organic compounds to determine the "photochemical age" of an air mass, *Geophys. Res. Lett.*, 27, 3865-3868, <https://doi.org/10.1029/2000gl011385>, 2000.
- Saito, T., Kawamura, K., Tsunogai, U., Chen, T. Y., Matsueda, H., Nakatsuka, T., Gamo, T., Uematsu, M., and Huebert, B. J.: Photochemical histories of nonmethane hydrocarbons inferred from their stable carbon isotope ratio measurements over east Asia, *J. Geophys. Res.*, 114, D11303, <https://doi.org/10.1029/2008jd011388>, 2009.
- Shao, M., Wang, B., Lu, S. H., Yuan, B., and Wang, M.: Effects of Beijing Olympics Control Measures on Reducing Reactive Hydrocarbon Species, *Environ. Sci. Technol.*, 45, 514-519, <https://doi.org/10.1021/es102357t>, 2011.
- Shao, P., An, J. L., Xin, J. Y., Wu, F. K., Wang, J. X., Ji, D. S., and Wang, Y. S.: Source apportionment of VOCs and the contribution to photochemical ozone formation during summer in the typical industrial area in the Yangtze River Delta, China, *Atmos. Res.*, 176-177, 64-74, <https://doi.org/10.1016/j.atmosres.2016.02.015>, 2016.
- Stroud, C. A., Roberts, J. M., Goldan, P. D., Kuster, W. C., Murphy, P. C., Williams, E. J., Hereid, D., Parrish, D., Sueper, D., Trainer, M., Fehsenfeld, F. C., Apel, E. C., Riemer, D., Wert, B., Henry, B., Fried, A., Martinez-Harder, M., Harder, H., Brune, W. H., Li, G., Xie, H., and Young, V. L.: Isoprene and its oxidation products, methacrolein and methylvinyl ketone, at an urban forested site during the 1999 Southern Oxidants Study, *J. Geophys. Res.*, 106, 8035-8046, <https://doi.org/10.1029/2000JD900628>, 2001.
- Sun, J., Wu, F. K., Hu, B., Tang, G. Q., Zhang, J. K., and Wang, Y. S.: VOC characteristics, emissions and contributions to SOA formation during hazy episodes, *Atmos. Environ.*, 141, 560-570, <https://doi.org/10.1016/j.atmosenv.2016.06.060>, 2016.
- Tan, Q. W., Zhou, L., Liu, H. F., Feng, M., Qiu, Y., Yang, F. M., Jiang, W. J., and Wei, F. S.: Observation-based summer O<sub>3</sub> control effect evaluation: A Case study in

- Chengdu, a megacity in Sichuan Basin, China, *Atmosphere*, 11, 1278, <https://doi.org/10.3390/atmos11121278>, 2020.
- Tan, Y., Han, S., Chen, Y., Zhang, Z., Li, H., Li, W., Yuan, Q., Li, X., Wang, T., and Lee, S.: Characteristics and source apportionment of volatile organic compounds (VOCs) at a coastal site in Hong Kong, *Sci. Total Environ.*, 777, 146241, <https://doi.org/10.1016/j.scitotenv.2021.146241>, 2021.
- Wang, B. L., Liu, Y., Shao, M., Lu, S. H., Wang, M., Yuan, B., Gong, Z. H., He, L. Y., Zeng, L. M., Hu, M., and Zhang, Y. H.: The contributions of biomass burning to primary and secondary organics: A case study in Pearl River Delta (PRD), China, *Sci. Total Environ.*, 569, 548-556, <https://doi.org/10.1016/j.scitotenv.2016.06.153>, 2016.
- Wang, H. L., Chen, C. H., Wang, Q., Huang, C., Su, L. Y., Huang, H. Y., Lou, S. R., Zhou, M., Li, L., Qiao, L. P., and Wang, Y. H.: Chemical loss of volatile organic compounds and its impact on the source analysis through a two-year continuous measurement, *Atmos. Environ.*, 80, 488-498, <https://doi.org/10.1016/j.atmosenv.2013.08.040>, 2013.
- Wang, Y., Cui, Y., He, Q. S., Fan, J., Li, Y. A., Liu, K. K., Guo, L. L., and Wang, X. M.: Significant impact of VOCs emission from coking and coal/biomass combustion on O<sub>3</sub> and SOA formation in taiyuan, China, *Atmos. Pollut. Res.*, 14, 101671, <https://doi.org/10.1016/j.apr.2023.101671>, 2023a.
- Wang, Z. Y., Shi, Z. B., Wang, F., Liang, W. Q., Shi, G. L., Wang, W. C., Chen, D., Liang, D. N., Feng, Y. C., and Russell, A. G.: Implications for ozone control by understanding the survivor bias in observed ozone-volatile organic compounds system, *npj Clim. Atmos. Sci.*, 5, 39, <https://doi.org/10.1038/s41612-022-00261-7>, 2022.
- Wang, Z. Y., Tian, X., Li, J., Wang, F., Liang, W. Q., Zhao, H., Huang, B., Wang, Z. H., Feng, Y. C., and Shi, G. L.: Quantitative evidence from VOCs source apportionment reveals O<sub>3</sub> control strategies in northern and southern China, *Environ. Int.*, 172, 107786, <https://doi.org/10.1016/j.envint.2023.107786>, 2023b.
- Warneke, C., McKeen, S. A., de Gouw, J. A., Goldan, P. D., Kuster, W. C., Holloway, J. S., Williams, E. J., Lerner, B. M., Parrish, D. D., Trainer, M., Fehsenfeld, F. C., Kato, S., Atlas, E. L., Baker, A., and Blake, D. R.: Determination of urban volatile organic compound emission ratios and comparison with an emissions database, *J. Geophys. Res.*, 112, D10S47, <https://doi.org/10.1029/2006JD007930>, 2007.
- Wei, W., Chen, S. S., Wang, Y., Cheng, L., Wang, X. Q., and Cheng, S. Y.: The impacts of VOCs on PM<sub>2.5</sub> increasing via their chemical losses estimates: A case study in a typical industrial city of China, *Atmos. Environ.*, 273, 118978, <https://doi.org/10.1016/j.atmosenv.2022.118978>, 2022.
- Wiedinmyer, C., Friedfeld, S., Baugh, W., Greenberg, J., Guenther, A., Fraser, M., and Allen, D.: Measurement and analysis of atmospheric concentrations of isoprene and

- its reaction products in central Texas, *Atmos. Environ.*, 35, 1001-1013, [https://doi.org/10.1016/s1352-2310\(00\)00406-4](https://doi.org/10.1016/s1352-2310(00)00406-4), 2001.
- Wu, C. H., Wang, C. M., Wang, S. H., Wang, W. J., Yuan, B., Qi, J. P., Wang, B. L., Wang, H. L., Wang, C., Song, W., Wang, X. M., Hu, W. W., Lou, S. R., Ye, C. S., Peng, Y. W., Wang, Z. L., Huangfu, Y. B., Xie, Y., Zhu, M. N., Zheng, J. Y., Wang, X. M., Jiang, B., Zhang, Z. Y., and Shao, M.: Measurement report: Important contributions of oxygenated compounds to emissions and chemistry of volatile organic compounds in urban air, *Atmos. Chem. Phys.*, 20, 14769-14785, <https://doi.org/10.5194/acp-20-14769-2020>, 2020.
- Wu, Y. J., Fan, X. L., Liu, Y., Zhang, J. Q., Wang, H., Sun, L. A., Fang, T. E., Mao, H. J., Hu, J., Wu, L., Peng, J. F., and Wang, S. L.: Source apportionment of VOCs based on photochemical loss in summer at a suburban site in Beijing, *Atmos. Environ.*, 293, 119459, <https://doi.org/10.1016/j.atmosenv.2022.119459>, 2023a.
- Wu, Y. T., Liu, B. S., Meng, H., Dai, Q. L., Shi, L. Y., Song, S. J., Feng, Y. C., and Hopke, P. K.: Changes in source apportioned VOCs during high O<sub>3</sub> periods using initial VOC-concentration-dispersion normalized PMF, *Sci. Total Environ.*, 896, 165182, <https://doi.org/10.1016/j.scitotenv.2023.165182>, 2023b.
- Xie, X., Shao, M., Liu, Y., Lu, S. H., Chang, C.-C., and Chen, Z.-M.: Estimate of initial isoprene contribution to ozone formation potential in Beijing, China, *Atmos. Environ.*, 42, 6000-6010, <https://doi.org/10.1016/j.atmosenv.2008.03.035>, 2008.
- Xiong, C., Wang, N., Zhou, L., Yang, F. M., Qiu, Y., Chen, J. H., Han, L., and Li, J. J.: Component characteristics and source apportionment of volatile organic compounds during summer and winter in downtown Chengdu, southwest China, *Atmos. Environ.*, 258, 118485, <https://doi.org/10.1016/j.atmosenv.2021.118485>, 2021.
- Yang, T., Liu, B. S., Yang, Y., Dai, Q. L., Zhang, Y. F., Feng, Y. C., and Hopke, P. K.: Improved positive matrix factorization for source apportionment of volatile organic compounds in vehicular emissions during the Spring Festival in Tianjin, China, *Environ. Pollut.*, 303, 119122, <https://doi.org/10.1016/j.envpol.2022.119122>, 2022.
- Yang, Y., Ji, D. S., Sun, J., Wang, Y. H., Yao, D., Zhao, S., Yu, X. N., Zeng, L. M., Zhang, R. J., Zhang, H., Wang, Y. H., and Wang, Y. S.: Ambient volatile organic compounds in a suburban site between Beijing and Tianjin: Concentration levels, source apportionment and health risk assessment, *Sci. Total Environ.*, 695, 133889, <https://doi.org/10.1016/j.scitotenv.2019.133889>, 2019.
- Yu, H., Liu, Q. Q., Wei, N. A., Hu, M. F., Xu, X. Z., Wang, S., Zhou, J. C., Zhao, W. X., and Zhang, W. J.: Investigation of summertime ozone formation and sources of volatile organic compounds in the suburb area of Hefei: A case study of 2020, *Atmosphere*, 14, 740, <https://doi.org/10.3390/atmos14040740>, 2023.
- Yuan, B., Shao, M., de Gouw, J., Parrish, D. D., Lu, S., Wang, M., Zeng, L., Zhang, Q., Song, Y., Zhang, J., and Hu, M.: Volatile organic compounds (VOCs) in urban air: How chemistry affects the interpretation of positive matrix factorization (PMF)

- analysis, *J. Geophys. Res.*, 117, D24302, <https://doi.org/10.1029/2012jd018236>, 2012.
- Zhan, J. L., Feng, Z. M., Liu, P. F., He, X. W., He, Z. M., Chen, T. Z., Wang, Y. F., He, H., Mu, Y. J., and Liu, Y. C.: Ozone and SOA formation potential based on photochemical loss of VOCs during the Beijing summer, *Environ. Pollut.*, 285, 117444, <https://doi.org/10.1016/j.envpol.2021.117444>, 2021.
- Zhang, Y. L., Wang, X. M., Barletta, B., Simpson, I. J., Blake, D. R., Fu, X. X., Zhang, Z., He, Q. F., Liu, T. Y., Zhao, X. Y., and Ding, X.: Source attributions of hazardous aromatic hydrocarbons in urban, suburban and rural areas in the Pearl River Delta (PRD) region, *J. Haz. Mat.*, 250, 403-411, <https://doi.org/10.1016/j.jhazmat.2013.02.023>, 2013.
- Zhao, Q. Y., Bi, J., Liu, Q., Ling, Z. H., Shen, G. F., Chen, F., Qiao, Y. Z., Li, C. Y., and Ma, Z. W.: Sources of volatile organic compounds and policy implications for regional ozone pollution control in an urban location of Nanjing, east China, *Atmos. Chem. Phys.*, 20, 3905-3919, <https://doi.org/10.5194/acp-20-3905-2020>, 2020.
- Zheng, H., Kong, S., Xing, X., Mao, Y., Hu, T., Ding, Y., Li, G., Liu, D., Li, S., and Qi, S.: Monitoring of volatile organic compounds (VOCs) from an oil and gas station in northwest China for 1 year, *Atmos. Chem. Phys.*, 18, 4567-4595, <https://doi.org/10.5194/acp-18-4567-2018>, 2018.
- Zheng, H., Kong, S., Chen, N., Niu, Z., Zhang, Y., Jiang, S., Yan, Y., and Qi, S.: Source apportionment of volatile organic compounds: Implications to reactivity, ozone formation, and secondary organic aerosol potential, *Atmos. Res.*, 249, 105344, <https://doi.org/10.1016/j.atmosres.2020.105344>, 2021.
- Zhou, B. A., Zhao, T. Y., Ma, J., Zhang, Y. X., Zhang, L. J., Huo, P., and Zhang, Y.: Characterization of VOCs during nonheating and heating periods in the typical suburban area of Beijing, China: Sources and health assessment, *Atmosphere*, 13, 560, <https://doi.org/10.3390/atmos13040560>, 2022.
- Zhu, B., Huang, X. F., Xia, S. Y., Lin, L. L., Cheng, Y., and He, L. Y.: Biomass-burning emissions could significantly enhance the atmospheric oxidizing capacity in continental air pollution, *Environ. Pollut.*, 285, 117523, <https://doi.org/10.1016/j.envpol.2021.117523>, 2021.
- Zhu, Y. H., Yang, L. X., Kawamura, K., Chen, J. M., Ono, K. R., Wang, X. F., Xue, L. K., and Wang, W. X.: Contributions and source identification of biogenic and anthropogenic hydrocarbons to secondary organic aerosols at Mt. Tai in 2014, *Environ. Pollut.*, 220, 863-872, <https://doi.org/10.1016/j.envpol.2016.10.070>, 2017.
- Zou, Y., Charlesworth, E., Wang, N., Flores, R. M., Liu, Q. Q., Li, F., Deng, T., and Deng, X. J.: Characterization and ozone formation potential (OFP) of non-methane hydrocarbons under the condition of chemical loss in Guangzhou, China, *Atmos. Environ.*, 262, 118630, <https://doi.org/10.1016/j.atmosenv.2021.118630>, 2021.
- Zou, Y., Yan, X., Flores, R. M., Zhang, L. Y., Yang, S., Fan, L. Y., Deng, T., Deng, X., and Ye, D.: Source apportionment and ozone formation mechanism of VOCs

considering photochemical loss in Guangzhou, China, *Sci. Total Environ.*, 903, 166191, <https://doi.org/10.1016/j.scitotenv.2023.166191>, 2023.
